# Supplementary material
Source: PubMed Central journal article supplement (PMC1895777)
Supplement: blood_2005-08-3453_1.pdf [file blood_2005-08-3453_1.pdf]

|                            |               | Size 0<br>(No Mutation) |     | Size 1 – 39 |      | Size 40+ |     |
|----------------------------|---------------|-------------------------|-----|-------------|------|----------|-----|
|                            |               | No.                     | %   | No.         | %    | No.      | %   |
| Treatment                  | S9333         | 67                      | 65% | 9           | 38%  | 9        | 39% |
| Study                      | S9500         | 36                      | 35% | 15          | 63%  | 14       | 61% |
| Sex                        | Female        | 51                      | 40% | 13          | 52%  | 11       | 50% |
|                            | Male          | 52                      | 50% | 12          | 48%  | 11       | 50% |
| Race                       | Asian         | 2                       | 2%  | 1           | 4%   | 1        | 5%  |
|                            | Black         | 10                      | 10% | 2           | 8%   | 4        | 18% |
|                            | White         | 91                      | 88% | 21          | 84%  | 17       | 77% |
|                            | Unknown       | 0                       | 0%  | 1           | 4%   | 0        | 0%  |
| AML Onset<br>(S9333 Only)  | De novo       | 55                      | 82% | 10          | 100% | 6        | 75% |
|                            | Secondary     | 12                      | 18% | 0           | 0%   | 2        | 25% |
| FAB<br>(Local)             | M1            | 20                      | 19% | 3           | 12%  | 7        | 32% |
|                            | M2            | 42                      | 41% | 6           | 24%  | 4        | 18% |
|                            | M4            | 27                      | 26% | 8           | 32%  | 6        | 27% |
|                            | M5            | 6                       | 6%  | 5           | 20%  | 4        | 18% |
|                            | M6            | 0                       | 0%  | 0           | 0%   | 0        | 0%  |
|                            | M7            | 1                       | 1%  | 0           | 0%   | 0        | 0%  |
|                            | M0            | 6                       | 6%  | 2           | 8%   | 1        | 5%  |
|                            | Other AML     | 1                       | 1%  | 1           | 4%   | 0        | 0%  |
|                            | AML NOS       | 0                       | 0%  | 0           | 0%   | 0        | 0%  |
| Evaluable<br>Cytogenetics? | Yes           | 87                      | 84% | 14          | 56%  | 13       | 59% |
|                            | No            | 16                      | 16% | 11          | 44%  | 9        | 41% |
| Normal<br>Cytogenetics?    | Yes           | 30                      | 34% | 12          | 86%  | 10       | 77% |
|                            | No            | 57                      | 66% | 2           | 14%  | 3        | 23% |
| Cytogenetic<br>Risk Group  | Favorable     | 11                      | 13% | 0           | 0%   | 1        | 8%  |
|                            | Intermediate  | 39                      | 45% | 12          | 86%  | 11       | 85% |
|                            | Unfavorable   | 35                      | 40% | 2           | 14%  | 1        | 8%  |
|                            | Indeterminate | 2                       | 2%  | 0           | 0%   | 0        | 0%  |
| ITD/WT<br>Ratio            | < 0.836       | --                      | --  | 11          | 46%  | 12       | 52% |
|                            | ≥ 0.836       | --                      | --  | 13          | 54%  | 11       | 48% |

|                       | Size 0 (No Mutation) |             | Size 1 – 39 |             | Size 40+ |             |
|-----------------------|----------------------|-------------|-------------|-------------|----------|-------------|
|                       | Median               | Range       | Median      | Range       | Median   | Range       |
| Age                   | 61                   | 19 – 84     | 50          | 18 – 82     | 46       | 33 – 76     |
| Marrow blasts (%)     | 70                   | 19 – 99     | 80          | 32 – 99     | 79       | 54 – 95     |
| WBC (1000/ $\mu$ L)   | 26.5                 | 0.8 – 263.2 | 37.2        | 2.9 – 180.3 | 48.5     | 9.3 – 272.5 |
| Peripheral blasts (%) | 44                   | 0 – 99      | 34          | 0 – 87      | 62       | 3 – 97      |
| ITD/WT ratio          | --                   | --          | 0.92        | 0.07 – 0.27 | 0.80     | 0.05 – 0.55 |
