# Supplementary material
Source: PubMed Central journal article supplement (PMC1895777)
Supplement: blood_2005-08-3453_2.pdf [file blood_2005-08-3453_2.pdf]

| Adjusted<br>for ITD/WT<br>Ratio? | Complete Response |                 |      | Overall Survival |                 |      | Relapse-Free Survival |                |      |
|----------------------------------|-------------------|-----------------|------|------------------|-----------------|------|-----------------------|----------------|------|
|                                  | Est.              | 95% CI          | P    | Est.             | 95% CI          | P    | Est.                  | 95% CI         | P    |
| No                               | -0.008            | -0.0204, 0.0042 | 0.19 | 0.0062           | -0.0001, 0.0126 | 0.07 | 0.0133                | 0.0034, 0.0231 | 0.02 |
| Yes                              | -0.009            | -0.0215, 0.0040 | 0.17 | 0.0060           | -0.0007, 0.0123 | 0.10 | 0.0128                | 0.0028, 0.0229 | 0.02 |

Abbreviations: Est, Estimated regression parameter for logistic (CR) or proportional hazards (OS, RFS) regression model; CI, confidence interval; P, two-sided p-value.
