# Supplementary material
Source: PubMed Central journal article supplement (PMC1895777)

DNA ITD/WT Ratio by ITD Size

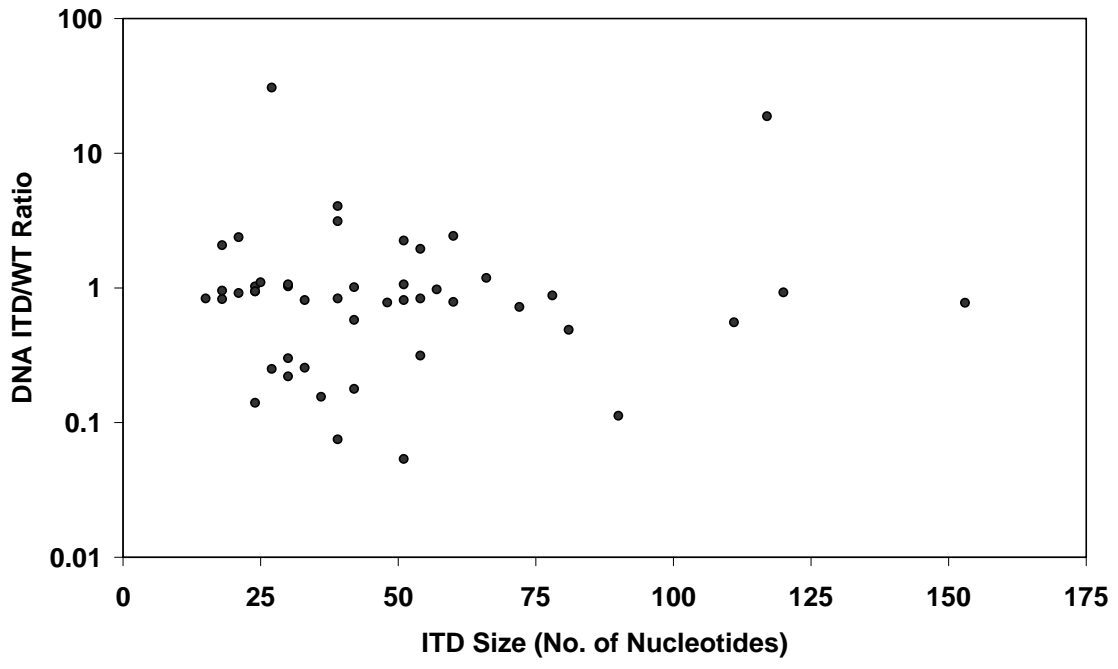

Supplement: blood_2005-08-3453_3.pdf [file blood_2005-08-3453_3.pdf]

### Overall Survival by ITD Size and ITD/WT Ratio

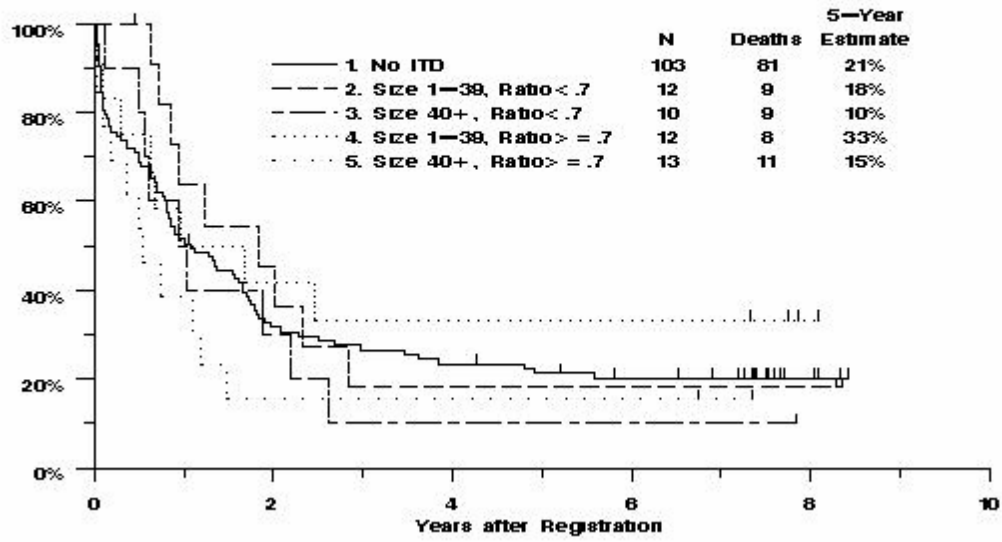

Supplement: blood_2005-08-3453_4.pdf [file blood_2005-08-3453_4.pdf]
